# Supplementary material for: Genetic Association of Lipids and Lipid Drug Targets With Abdominal Aortic Aneurysm: A Meta-analysis
Source: PubMed Central journal article supplement (PMC5833524; doi:10.1001/jamacardio.2017.4293), 2017-11-29
Supplement: jamacardiol-e174293-s001.pdf [file jamacardiol-e174293-s001.pdf]

## Supplementary Online Content

Harrison SC, Holmes MV, Burgess S, et al. Genetic association of lipids and lipid drug targets with abdominal aortic aneurysm: a meta-analysis. *JAMA Cardiol.* Published online November 29, 2017. 10.1001/jamacardio.2017.4293

### **eAppendix.** Methods

**eTable 1.** The Effect Size for 180 SNPs on AAA, CHD (from the Cardiogram Dataset) and Lipid Fractions (from the Global Lipid Genetics Consortium GWAS), Expressed as Beta Coefficients and Standard Errors (e.g. AAA\_beta and AAA\_se)

**eTable 2.** Association of Lipid GRS with CHD in the CARDIoGRAMplusC4D Dataset Using Inverse Weighted MR and MR-Egger

### **eReferences**

This supplementary material has been provided by the authors to give readers additional information about their work.

## **Table of Contents**

### **eAppendix. Methods**

#### **Cohorts**

**The Aneurysm Consortium**

**New Zealand (NZ) Vascular Genetics Study AAA GWAS dataset**

**US (PA) GWAS dataset**

**Iceland, deCODE Genetics AAA GWAS dataset**

**The Netherlands AAA GWAS dataset**

**SMART study**

**Association of Lipid GRS with CHD**

#### **Supplementary tables**

**eTable 1. The effect size for 180 SNPs on AAA, CHD (from the Cardiogram dataset) and Lipid Fractions (from the Global Lipid Genetics Consortium GWAS), expressed as beta coefficients and standard errors (e.g. AAA\_beta and AAA\_se). This table is provided as a separate Excel file.**

**eTable 2. Association of lipid GRS with CHD in the CARDIoGRAMplusC4D dataset using inverse weighted MR and MR-Egger.**

#### **eReferences**

## **eAppendix. Methods**

### **Cohorts**

The GWAS cohorts used in this MS are described in detail in the recent meta-analysis of AAA GWAS study(1).

#### **The Aneurysm Consortium**

Aneurysm Consortium (AC) AAA GWAS dataset: The AC recruited cases of AAA from centers across the United Kingdom and Western Australia. Cases were defined as patients with an infra-renal aortic diameter  $\geq 30$  mm proven on ultrasound or computerized tomography (CT) scan. Controls were taken from the Wellcome Trust Case Control Consortium 2 (WTCCC2) common control group(2) and were, therefore, unscreened for AAA.

Data from 1,866 cases with AAA and 5,435 unscreened controls from the WTCCC2 study consisting of samples from the 1958 British Birth Cohort and from the UK National Blood Service. DNA samples were processed at the Wellcome Trust Sanger Institute (WTSI). Genomic DNA was quantified by PicoGreen assay, and quality control (QC) assured by both agarose gel electrophoresis and Sequenom iPLEX genotyping of 29 SNPs and 4 sex-specific markers. Genotyping for the discovery study was performed using Illumina 1.2M (controls) or 670K (AAA) BeadChips.

As part of the original AC GWAS individual sample QC had been performed as follows. QC was first performed by exclusion of SNPs with call rates  $< 0.98$  and those that demonstrated significant deviation from Hardy-Weinberg equilibrium in the control group ( $P < 5 \times 10^{-4}$ ). Duplicate samples and those that failed genotyping (sample call rates  $< 0.98$ ) were also excluded from further analysis. Genotyping cluster plots for all SNPs with  $P < 1 \times 10^{-4}$  were visually inspected to exclude from further analysis positive associations generated by erroneous genotyping or calling. Checks for population stratification were performed by PLINK identical by state clustering and extreme outliers were removed from the analysis.

Imputation was performed using IMPUTE 2.2 run on the BCISNPmax database platform (version 3.5, BCI Platforms, Espoo, Finland). The reference haplotypes were based on the 1000 Genomes June 2011 release. Imputed calls were filtered by quality score (excluding those  $< 0.9$ ) to restrict to higher quality imputed SNPs.

Following imputation further QC filtering was performed, excluding SNPs with call rates  $< 0.98$  and those that demonstrated significant deviation from Hardy-Weinberg equilibrium in the control group ( $P < 5 \times 10^{-4}$ ). Duplicate samples and those that failed genotyping (sample call rate  $< 0.98$ ) were also excluded from further analysis. Association testing was carried out in PLINK.

#### **New Zealand (NZ) Vascular Genetics Study AAA GWAS dataset**

The Vascular Research Consortium of New Zealand recruited New Zealand men and women with a proven history of AAA (infra-renal aortic diameter  $\geq 30$  mm proven on ultrasound or CT scan). Approximately 80% had undergone surgical AAA repair (typically AAA's  $> 50$ - $55$  mm in diameter). The vast majority of cases ( $> 97\%$ ) were of Anglo-European ancestry. The control group underwent an abdominal ultrasound scan

to exclude (>25 mm) concurrent AAA and Anglo-European ancestry was required for inclusion. Controls were also screened for peripheral artery disease (PAD; using ankle brachial index), carotid artery disease (ultrasound) and other cardiovascular risk factors.

Two separate GWAS were performed using New Zealand samples. NZ GWAS 1 consisted of 608 AAA patients (474 male) and 612 elderly controls (450 male), genotyped using the Affymetrix SNP 6 GeneChip array. All samples had call rates >0.95 (mean 0.992). NZ GWAS 2 consisted of 397 AAA patients (332 male) and 384 elderly controls (308 male), genotyped using the Illumina Infinium Omni2.5 BeadChip array. All samples had call rates >0.95 (mean 0.990). All NZ genomic DNA samples exceeded manufacturers quality and quantity requirements having undergone pre-assessment by Nanophotometer (Implen GmbH, München, Germany) and agarose gel electrophoresis.

Imputation was conducted separately on NZ GWAS 1 and 2 data sets using the same methods as used for the AC datasets. IMPUTE 2.2 was run on the BCISNPmax database platform (version 3.5, BCI Platforms, Espoo, Finland). The reference haplotypes were based on the 1000 Genomes June 2011 release. Imputed calls were filtered by quality score (excluding those <0.9) to restrict to higher quality imputed SNPs. The genomic inflation factors ( $\lambda$ ) were 1.07 and 1.05 respectively (MAF >0.05).

Both NZ GWAS 1 and 2 data sets underwent QC filtering, excluding SNPs with call rates < 0.98 and those that demonstrated significant deviation from Hardy-Weinberg equilibrium in the control group ( $P < 5 \times 10^{-4}$ ). Duplicate samples and those that failed genotyping (sample call rate <0.98) were also excluded from further analysis.

### **US (PA) GWAS dataset**

AAA patients were enrolled through the Department of Vascular Surgery at Geisinger Medical Center, Danville, Pennsylvania, USA as previously reported. To identify cases and controls from the electronic medical records, an ePhenotyping algorithm was developed(3). Briefly, Structured Query Language (SQL) was used to script the algorithm utilizing “Current Procedural Terminology” (CPT) and “International Classification of Diseases” (ICD-9) codes as well as demographic and encounter data to classify individuals as case, control, or excluded. AAA cases were defined as having an AAA repair procedure (case Type 1), or at least one appropriate specialty encounter (vascular clinic) with a ruptured AAA (case Type 2), or at least two specialty encounters with an unruptured AAA (case Type 3). Controls were neither cases nor those excluded, had an encounter within the past 5 years, and had never been assigned an ICD9 code of 441.\*, where \* is a 1 or 2 digit code. Individuals were excluded if 1) they had a thoracic aortic aneurysm or a rare heritable disease with aortic manifestation; 2) they were younger than 40 or older than 89 years, 3) they had a single encounter with a code without mention of rupture (441.4), or 4) they had not had an encounter within the past 5 years. Rare heritable diseases were excluded because the goal of the current study was to identify non-syndromic AAA. Controls under 40 years might yet manifest an AAA, while cases under 40 years of age and without rare syndromic forms of aortic aneurysms are likely due to trauma. The AAA algorithm can be downloaded from [www.PheKb.org](http://www.PheKb.org). The algorithm was validated on a subset of individuals by manual chart review, and implemented at eMERGE network sites. The algorithm was implemented as a workflow in the Konstanz Information Miner (KNIME) (<http://www.knime.org/>).

AAA cases had infrarenal aortic diameter  $\geq 30$  mm as revealed by abdominal imaging. Approximately 20% of individuals with AAA had a family history of AAA. A control group was obtained through the Geisinger MyCode® Project, a cohort of Geisinger Clinic patients recruited for genomic studies. The MyCode® controls were matched for age distribution and sex to the Geisinger Vascular Clinic AAA cases. Based on electronic medical records, controls had no ICD-9 codes for AAA in their records, but they were not screened by ultrasonography for AAA. Both cases and controls from the Geisinger Clinic were of European descent.

The GWAS data used for this study was a subset of a larger cohort comprising 3,264 samples from 3,149 individuals with three phenotypes: 922 putative AAA cases, 981 obesity cases and 1,246 controls. Samples were genotyped on the Illumina HumanOmniExpress-12v1.0 genotyping platform at the University of Pittsburgh Genomics and Proteomics Core Laboratories. Genotypes were called using the Illumina GenomeStudio v2010.3 software. QC consisted of a number of steps: identification of cross-contamination and removal of specimens, call rate of samples ( $>0.98$  SNPs called), sex consistency between annotated sex and genotyped sex, SNP discordance between replicate sample pairs, SNP call rate ( $>0.95$  calls in all specimens), SNP minor allele frequency ( $>0.01$ ), SNP Hardy-Weinberg equilibrium ( $P > 1 \times 10^{-4}$ ), and selection of replicates to retain based on sex-specific Mahalanobis distance ( $<4.1$ ) and Illumina P10.GC ( $>0.71$ ). Cross-contamination of samples was detected by excess heterozygosity and excess relatedness (related to more than half of other samples at  $\text{Pi-hat} > 0.0625$ ); four samples were removed prior to other QC steps. After the QC steps above, related individuals (pairwise  $\text{Pi-hat} > 0.15$ ) were removed, retaining the individual and specimen with the highest call rate. A second round of QC applied using the above SNP and sample criteria to ensure consistency after removal of SNPs and individuals. In addition, the SNP criteria were analyzed per chromosome to ensure that there were no systematic differences (no differences detected). Lastly, principle component analysis (PCA) was used to determine if there were any batch effects during genotyping (no evidence for batch effects). Of the 3,264 samples, 153 were removed for one or more of the QC reasons above. Of the 731,306 SNPs, 95,369 were removed; 2,012 were discordant, 13,107 had a low call rate, 78,086 had a  $\text{MAF} < 0.01$ , and 14,056 had a HWE  $P < 1 \times 10^{-4}$  (9,047 SNPs were removed for more than one reason).

The final meta-analysis cohort comprised only those individuals who were identified as definitive AAA cases or controls using the rigorous ePhenotyping algorithm described above.

Imputation was performed as previously described(4). Briefly: SNPs were re-mapped to the Genome Reference Consortium Human build 37 (GRCh37) and the program liftOver run to ensure mapping consistency. Subsequently all SNPs were mapped from the Illumina TOP notation to the plus (+) strand. Strand was checked using SHAPEIT2 (version r2.644)(5). Next the data were phased using SHAPEIT2. Imputation was performed using IMPUTE2 (version 2.3.0)(6). Chromosomes were divided into 6 MB segments with 250 kbp overlap between segments. A total of 5,719,283 SNPs with an info score of  $\geq 0.9$  were used for analysis.

Association analysis without adjustment was performed using PLINK (v1.09)(7) and the imputed SNPs. The eMERGE Network Imputed GWAS for 41 Phenotypes (the dbGaP eMERGE Phase 1 and 2 Merged data Submission) accession number is: phs000888.v1.p1 which includes these AAA data.

## Iceland, deCODE Genetics AAA GWAS dataset

Icelandic individuals with AAA (defined as infra-renal aortic diameter  $\geq 30$  mm) were recruited from a registry of individuals who were admitted at Landspítali University Hospital, in Reykjavik, Iceland, 1980 – 2006. AAA patients were either followed up or treated by intervention for emergency repair of symptomatic or ruptured AAA or for an elective repair by surgery or endovascular intervention. In total, whole genome data from subjects with AAA, enrolled as part of the cardiovascular disease (CVD) genetics program at deCODE, were included in the metaGWAS. The Icelandic controls used were selected from individuals who have participated in various GWA studies and who were recruited as part of genetic programs at deCODE. Individuals with known CVD were excluded as controls(8) but controls were unscreened for AAA.

The Icelandic case and control samples were assayed with the Illumina HumanHap300, HumanHapCNV370 or HumanHap610 bead chips (Illumina, San Diego, CA, USA). Only SNPs present on all chips were included in the analysis and SNPs were excluded if they had (a) call rates  $<95\%$  in cases or controls, (b)  $MAF < 0.01$  in the controls, or (c) showed significant deviation from Hardy-Weinberg equilibrium in the controls ( $P < 1 \times 10^{-4}$ ). These criteria were applied separately to genotype data from each of the chip types used and SNPs that showed significant deviation ( $P < 1 \times 10^{-4}$  in an ANOVA test) in frequency between the chips were excluded from the analysis. Any samples with a call rate  $<98\%$  were excluded from the analysis. The final analysis included 293,677 SNPs present on all three chips.

For case-control association analysis, we used a standard likelihood ratio statistic, implemented in the NEMO software(9)(9) to calculate two-sided P values and ORs for each individual allele, assuming a multiplicative model for risk(10).

## The Netherlands AAA GWAS dataset

The AAA sample set from Utrecht was recruited in 2007-2009 from 8 centres in The Netherlands, mainly when individuals visited their vascular surgeon in the clinic or, in rare cases, during hospital admission for elective or emergency AAA surgery. An AAA was defined as an infrarenal aorta  $\geq 30$  mm. The sample set comprised 89.9% males, with a mean AAA diameter of 58.4 mm, 61.7% had been operated on, of which 8.1 % were after rupture. The Dutch controls used in the AAA GWAS were recruited as part of the Nijmegen Biomedical Study and the Nijmegen Bladder Cancer Study (see <http://dceg.cancer.gov/icbc/membership.html>).

Genotyping was performed on Illumina HumanHap610 chips. As controls, we included 2791 Dutch subjects who were recruited as part of the Nijmegen Biomedical Study ( $n=1,832$ ) and the Nijmegen Bladder Cancer Study ( $n=1,278$ ) These controls were genotyped on Illumina CNV370 Duo BeadChips.

We performed QC using PLINK version 1.07. After removal of SNPs with A/T or C/G alleles and SNPs that were not called in any individual, we performed sample QC and SNP QC.

Sample QC was performed after merging cases and controls, using a subset of common, high-quality SNPs [as defined by SNPs without deviation from Hardy-Weinberg equilibrium ( $P > 0.001$ ), with high MAF ( $> 0.2$ ) and with low rate of missing genotypes ( $< 0.01$ )]. Linkage disequilibrium (LD) pruning ( $r^2 > 0.5$ ) was performed. Subjects were removed based on the following three criteria: missing genotypes (subjects with call

rates < 0.95 were removed), heterozygosity (subjects were excluded if the inbreeding coefficient deviated more than 3 standard deviations from the mean) and cryptic relatedness (by calculating identity-by-descent (IBD) for each pair of individuals). In each pair with an IBD proportion of >20%, a subject was excluded, if it exhibited distant relatedness with more than one individual. For case-control pairs, we removed the control subject. In the case-case or control-control pairs, the subject with the lowest call rate was excluded.

Using these common, high-quality SNPs, we performed PCA using EIGENSTRAT on the remaining study subjects and HapMap-CEU subjects. We excluded SNPs from three regions with known long-distance LD: the major histocompatibility (MHC) region (chr6: 25.8-36 Mbp), the chromosome 8 inversion (chr8: 6-16 Mbp) and a chromosome 17 region (chr17: 40-45 Mbp). We created PC plots with the first four PCs, using R version 2.11. Based on visual inspection of these plots, we excluded subjects that appeared to be outliers with respect to the CEU or the study population. After outlier removal, we recomputed PCs for them to be included as covariates in the logistic regression models.

After sample QC, we excluded SNPs with more than 2% missing genotypes, MAF < 0.01, missing genotype rate higher than MAF, and HWE deviation ( $P < 0.001$ ). Because cases and controls had been genotyped separately, we performed these QC steps in each study cohort separately and again after merging cases and controls. We also removed SNPs with a differential degree of missing genotypes between cases and controls ( $P < 1 \times 10^{-5}$ ; chi-squared test).

We performed genotype imputation using the pre-phasing/imputation stepwise approach implemented in IMPUTE2 and SHAPEIT (chunk size of 3 Mb and default parameters)(5,11). The imputation reference set consisted of 2,184 phased haplotypes from the full 1000 Genomes Project data set (February 2012; 40,318,253 variants). All genomic locations are given in NCBI Build 37/UCSC hg19 coordinates. After imputation, SNPs with an imputation accuracy score < 0.6 or MAF < 0.005 were excluded.

Association testing was carried out in PLINK(7) using imputed SNP dosages. We included as covariates the first four PCs. We calculated genomic inflation factors ( $\lambda_{GC}$ ), defined as the ratio of the median of the empirically observed distribution of the test statistic to the expected median(12)

### SMART study

The Secondary Manifestations of ARterial disease (SMART) study is a prospective outpatient cohort study among patients aged 18-74 years newly referred to the University Medical Center Utrecht, The Netherlands, because of atherosclerotic vascular disease or for treatment of atherosclerotic risk factors. The objective of SMART is to determine the prevalence of concomitant asymptomatic arterial disease and risk factors in patients presenting with a manifestation of arterial disease or risk factor, and to study the incidence of future cardiovascular events and their predictors in these high-risk patients. Details of the protocol have been described elsewhere(13). DNA for wet-lab genotyping to replicate discovery results of the current study was available in a total of 8,361 SMART participants. There are 631 incident and prevalent AAA cases (defined as an infra-renal aortic diameter  $\geq 3$  cm) and 6,342 controls included in the analyses. There were 222 prevalent AAA end-points seen during follow. AAA endpoints included death, open surgical repair and/or endovascular stenting.

### **Association of Lipid GRS with CHD**

As a positive control for our analysis we examined the association of lipid GRSs with CHD in the CARDIoGRAMplusC4D dataset(14) using the same methods as in the main manuscript. These findings are presented in eTable 2.

**eTable 1.** The Effect Size for 180 SNPs on AAA, CHD (from the Cardiogram Dataset) and Lipid Fractions (from the Global Lipid Genetics Consortium GWAS), Expressed as Beta Coefficients and Standard Errors (e.g. AAA\_beta and AAA\_se)

This table is provided as a separate Excel file.

| rsID       | Allele 1 | Allele 2 | AAA_beta | AAA_se | AAA P-Value | LDL_beta | HDL_beta | TG_beta | LDL_se | HDL_se | TG_se  |
|------------|----------|----------|----------|--------|-------------|----------|----------|---------|--------|--------|--------|
| rs651720   | t        | g        | -0.2848  | 0.0413 | 5.20E-12    | -0.2209  | 0.0249   | -0.0084 | 0.0061 | 0.0057 | 0.0056 |
| rs646776   | t        | c        | 0.1644   | 0.0299 | 3.90E-08    | 0.1602   | -0.034   | 0.0034  | 0.0044 | 0.0041 | 0.004  |
| rs515135   | t        | c        | -0.1218  | 0.0332 | 0.000241    | -0.1394  | 0.011    | -0.0192 | 0.0048 | 0.0044 | 0.0044 |
| rs894210   | a        | g        | -0.089   | 0.0247 | 0.00032     | -0.0071  | 0.0689   | -0.0671 | 0.0037 | 0.0034 | 0.0033 |
| rs12678919 | a        | g        | 0.1441   | 0.0419 | 0.000591    | 0.008    | -0.1554  | 0.1702  | 0.0061 | 0.0057 | 0.0056 |
| rs7703051  | a        | c        | 0.0822   | 0.0253 | 0.001143    | 0.0727   | 0.002    | 0.0057  | 0.0037 | 0.0035 | 0.0034 |
| rs838876   | a        | g        | -0.0873  | 0.0276 | 0.001546    | -0.003   | 0.0493   | -0.0052 | 0.0042 | 0.0039 | 0.0037 |
| rs2954022  | a        | c        | -0.0744  | 0.0244 | 0.002338    | -0.0546  | 0.0399   | -0.078  | 0.0036 | 0.0034 | 0.0033 |
| rs10282707 | t        | c        | 0.0743   | 0.0252 | 0.003238    | -0.0084  | -0.025   | 0.0092  | 0.0038 | 0.0035 | 0.0034 |
| rs9989419  | a        | g        | 0.0821   | 0.0283 | 0.003697    | 0.0277   | -0.1473  | 0.0243  | 0.0039 | 0.0036 | 0.0035 |
| rs492571   | t        | c        | -0.2227  | 0.0768 | 0.003718    | 0.0033   | 0.0663   | -0.0799 | 0.0097 | 0.009  | 0.0088 |
| rs17508045 | t        | c        | 0.1298   | 0.0453 | 0.004144    | 0.0488   | -0.0085  | -0.0083 | 0.0066 | 0.0061 | 0.006  |

|                |   |   |                 |            |              |                 |                 |                 |            |            |            |
|----------------|---|---|-----------------|------------|--------------|-----------------|-----------------|-----------------|------------|------------|------------|
| rs499<br>974   | a | c | 0.087<br>3      | 0.032<br>3 | 0.006<br>868 | 0.001<br>2      | -<br>0.026<br>3 | -0.009          | 0.004<br>7 | 0.004<br>4 | 0.004<br>2 |
| rs107<br>90162 | a | g | 0.121<br>7      | 0.047<br>2 | 0.009<br>889 | 0.076           | -<br>0.095<br>1 | 0.230<br>5      | 0.007<br>2 | 0.006<br>7 | 0.006<br>5 |
| rs180<br>0961  | t | c | 0.163<br>6      | 0.066<br>8 | 0.014<br>29  | -<br>0.068<br>5 | -0.127          | -<br>0.001<br>7 | 0.010<br>6 | 0.009<br>9 | 0.009<br>4 |
| rs446<br>5830  | a | g | 0.076<br>3      | 0.031<br>2 | 0.014<br>33  | -0.009          | 0.059<br>7      | -<br>0.053<br>4 | 0.004<br>7 | 0.004<br>4 | 0.004<br>3 |
| rs148<br>2852  | a | g | 0.068<br>6      | 0.028<br>2 | 0.014<br>88  | 0.002<br>9      | -<br>0.020<br>9 | 0.013           | 0.003<br>8 | 0.003<br>5 | 0.003<br>5 |
| rs225<br>5141  | a | g | -<br>0.062<br>5 | 0.027<br>6 | 0.023<br>68  | 0.029<br>9      | 0.033<br>7      | -<br>0.020<br>9 | 0.004      | 0.003<br>7 | 0.003<br>6 |
| rs688<br>2076  | t | c | -<br>0.057<br>2 | 0.025<br>5 | 0.024<br>94  | -<br>0.045<br>6 | -<br>0.001<br>5 | -<br>0.028<br>6 | 0.003<br>8 | 0.003<br>5 | 0.003<br>5 |
| rs654<br>4713  | t | c | 0.056<br>6      | 0.026<br>3 | 0.031<br>71  | 0.080<br>6      | -0.003          | 0.012<br>6      | 0.004<br>1 | 0.003<br>8 | 0.003<br>7 |
| rs407<br>5205  | t | c | 0.052<br>9      | 0.024<br>8 | 0.032<br>77  | -<br>0.011<br>9 | 0.022<br>4      | -0.009          | 0.003<br>8 | 0.003<br>5 | 0.003<br>4 |
| rs174<br>532   | a | g | 0.060<br>3      | 0.028<br>4 | 0.033<br>74  | 0.035<br>3      | 0.021<br>2      | -<br>0.015<br>9 | 0.004<br>2 | 0.003<br>9 | 0.003<br>8 |
| rs261<br>342   | c | g | 0.092<br>6      | 0.045<br>1 | 0.040<br>05  | 0.002<br>6      | -<br>0.106<br>9 | -<br>0.044<br>8 | 0.006<br>5 | 0.006      | 0.005<br>9 |
| rs799<br>160   | t | c | 0.051<br>8      | 0.025<br>3 | 0.040<br>62  | 0.004<br>5      | -<br>0.013<br>3 | 0.039<br>8      | 0.003<br>9 | 0.003<br>7 | 0.003<br>6 |
| rs241<br>2710  | a | g | 0.222<br>6      | 0.111<br>2 | 0.045<br>29  | -<br>0.002<br>4 | -0.084          | 0.098<br>8      | 0.014<br>8 | 0.013<br>9 | 0.013<br>2 |
| rs131<br>07325 | t | c | -<br>0.100<br>9 | 0.051<br>6 | 0.050<br>3   | -<br>0.015<br>6 | -<br>0.070<br>8 | 0.030<br>9      | 0.008<br>3 | 0.007<br>8 | 0.007<br>7 |
| rs177<br>89218 | t | c | 0.057<br>3      | 0.029<br>7 | 0.053<br>69  | 0.024<br>1      | -<br>0.004<br>1 | 0.006<br>1      | 0.004<br>3 | 0.004      | 0.004      |

|            |   |   |         |        |         |         |         |         |        |        |        |
|------------|---|---|---------|--------|---------|---------|---------|---------|--------|--------|--------|
| rs1515110  | t | g | 0.0482  | 0.0255 | 0.05807 | 0.0063  | -0.0323 | 0.0265  | 0.0037 | 0.0035 | 0.0034 |
| rs7640978  | t | c | 0.0816  | 0.0441 | 0.0643  | -0.0392 | 0.0003  | -0.0178 | 0.0069 | 0.0064 | 0.0063 |
| rs7033354  | t | c | -0.0481 | 0.026  | 0.06449 | -0.0189 | 0.0154  | -0.019  | 0.0038 | 0.0035 | 0.0034 |
| rs1035744  | t | c | 0.0656  | 0.036  | 0.06801 | 0.0069  | -0.0055 | 0.0207  | 0.0041 | 0.0038 | 0.0038 |
| rs1689797  | a | c | -0.0473 | 0.026  | 0.0686  | 0.0142  | -0.0358 | 0.0106  | 0.0039 | 0.0036 | 0.0035 |
| rs4939883  | t | c | 0.0583  | 0.0322 | 0.06999 | -0.0211 | -0.0799 | -0.0052 | 0.0048 | 0.0045 | 0.0043 |
| rs10401969 | t | c | 0.0845  | 0.0467 | 0.07061 | 0.1184  | -0.0128 | 0.121   | 0.0072 | 0.0068 | 0.0065 |
| rs3822072  | a | g | -0.0453 | 0.0252 | 0.07218 | 0.0074  | -0.0251 | 0.0182  | 0.0037 | 0.0034 | 0.0034 |
| rs2000999  | a | g | 0.0555  | 0.031  | 0.0738  | 0.065   | 0.0023  | 0.0185  | 0.0046 | 0.0043 | 0.0042 |
| rs6065311  | t | c | -0.0399 | 0.0245 | 0.1043  | -0.0417 | -0.0024 | -0.0061 | 0.0036 | 0.0034 | 0.0033 |
| rs2980885  | a | g | -0.0474 | 0.0294 | 0.1096  | -0.0313 | 0.0354  | -0.0578 | 0.0045 | 0.0042 | 0.0041 |
| rs6859     | a | g | 0.0407  | 0.026  | 0.1171  | 0.0835  | -0.0176 | 0.0141  | 0.0039 | 0.0036 | 0.0035 |
| rs11660468 | t | c | 0.0385  | 0.0249 | 0.1224  | 0.0111  | 0.0391  | -0.0008 | 0.0037 | 0.0034 | 0.0034 |
| rs6489818  | a | g | 0.0484  | 0.0314 | 0.124   | 0.0281  | -0.0004 | -0.0036 | 0.0048 | 0.0045 | 0.0043 |
| rs10493326 | a | g | -0.0437 | 0.0285 | 0.1246  | 0.0213  | -0.0013 | 0.0311  | 0.0043 | 0.004  | 0.0039 |

|            |   |   |         |        |        |         |         |         |        |        |        |
|------------|---|---|---------|--------|--------|---------|---------|---------|--------|--------|--------|
| rs952044   | t | c | 0.0395  | 0.026  | 0.1279 | -0.0033 | -0.0231 | 0.0101  | 0.0039 | 0.0037 | 0.0036 |
| rs1367117  | a | g | 0.0398  | 0.0264 | 0.1318 | 0.1186  | -0.0223 | 0.0252  | 0.004  | 0.0037 | 0.0036 |
| rs1535     | a | g | 0.0389  | 0.0259 | 0.1324 | 0.0529  | 0.0391  | -0.0463 | 0.0038 | 0.0036 | 0.0035 |
| rs4660293  | a | g | -0.0422 | 0.0284 | 0.1363 | -0.0105 | 0.0353  | -0.0203 | 0.0043 | 0.004  | 0.0039 |
| rs3761445  | a | g | 0.0468  | 0.0318 | 0.1416 | 0.0081  | -0.0158 | 0.0232  | 0.0037 | 0.0035 | 0.0034 |
| rs4791641  | t | c | -0.0358 | 0.0246 | 0.1455 | -0.0202 | -0.0041 | 0.0028  | 0.0037 | 0.0034 | 0.0033 |
| rs2293889  | t | g | 0.0356  | 0.0249 | 0.1526 | 0.0147  | -0.0312 | 0.0062  | 0.0038 | 0.0035 | 0.0034 |
| rs6603981  | t | c | 0.043   | 0.0304 | 0.1566 | 0.034   | 0.0039  | 0.0072  | 0.0044 | 0.0042 | 0.004  |
| rs326214   | a | g | 0.0364  | 0.026  | 0.1613 | 0.0071  | -0.0609 | 0.0235  | 0.0047 | 0.0045 | 0.0042 |
| rs2328223  | a | c | -0.0444 | 0.0327 | 0.1745 | -0.0299 | 0.0004  | 0.0066  | 0.005  | 0.0046 | 0.0045 |
| rs7897379  | t | c | 0.0331  | 0.0245 | 0.1775 | -0.0104 | -0.0194 | 0.0274  | 0.0037 | 0.0034 | 0.0033 |
| rs2652834  | a | g | 0.0518  | 0.0387 | 0.1812 | 0.0019  | -0.0285 | 0.0247  | 0.0046 | 0.0043 | 0.0042 |
| rs653178   | t | c | -0.0357 | 0.0268 | 0.1839 | 0.0227  | 0.0263  | -0.0099 | 0.0038 | 0.0035 | 0.0034 |
| rs12670798 | t | c | -0.0381 | 0.0288 | 0.1859 | -0.0344 | 0.0014  | -0.0101 | 0.0043 | 0.004  | 0.0039 |
| rs1883025  | t | c | -0.0367 | 0.028  | 0.1896 | -0.0296 | -0.0698 | -0.0219 | 0.0044 | 0.0041 | 0.004  |

|            |   |   |         |        |        |         |         |         |        |        |        |
|------------|---|---|---------|--------|--------|---------|---------|---------|--------|--------|--------|
| rs38855    | a | g | -0.0319 | 0.0246 | 0.195  | 0.001   | -0.0146 | 0.0187  | 0.0036 | 0.0034 | 0.0033 |
| rs1260326  | t | c | 0.0313  | 0.0252 | 0.2138 | 0.0206  | -0.0113 | 0.1148  | 0.0037 | 0.0035 | 0.0034 |
| rs2290547  | a | g | 0.0466  | 0.0377 | 0.2158 | 0.0006  | -0.0297 | 0.0096  | 0.0049 | 0.0046 | 0.0044 |
| rs579459   | t | c | 0.0373  | 0.0303 | 0.2182 | -0.0665 | -0.0145 | 0.0137  | 0.0045 | 0.0042 | 0.0041 |
| rs2288002  | a | g | -0.0302 | 0.0247 | 0.2204 | -0.0285 | -0.0069 | -0.0089 | 0.0038 | 0.0035 | 0.0034 |
| rs3780181  | a | g | 0.0574  | 0.0475 | 0.2261 | 0.0445  | 0.0038  | -0.0069 | 0.0074 | 0.0068 | 0.0066 |
| rs1250229  | t | c | 0.0336  | 0.0278 | 0.2275 | -0.0243 | 0.0034  | -0.0089 | 0.0042 | 0.0039 | 0.0038 |
| rs998584   | a | c | 0.0344  | 0.0287 | 0.231  | 0.0005  | -0.026  | 0.0293  | 0.004  | 0.0038 | 0.0037 |
| rs1010167  | c | g | 0.034   | 0.0289 | 0.2396 | -0.025  | 0.0044  | -0.0016 | 0.0039 | 0.0037 | 0.0035 |
| rs3817588  | t | c | 0.0365  | 0.0312 | 0.2418 | 0.0255  | -0.0049 | 0.0674  | 0.0046 | 0.0043 | 0.0042 |
| rs17173637 | t | c | -0.0495 | 0.0429 | 0.2487 | -0.0069 | 0.0363  | -0.0211 | 0.0062 | 0.0057 | 0.0056 |
| rs4722551  | t | c | 0.0389  | 0.0343 | 0.2565 | -0.0391 | -0.0101 | 0.0267  | 0.0049 | 0.0045 | 0.0044 |
| rs2472509  | t | g | -0.0298 | 0.0264 | 0.2585 | -0.0004 | -0.0227 | 0.0024  | 0.0039 | 0.0037 | 0.0036 |
| rs1781930  | a | g | -0.0349 | 0.0316 | 0.2691 | -0.0102 | -0.0018 | -0.0314 | 0.0048 | 0.0045 | 0.0043 |
| rs17145738 | t | c | -0.0421 | 0.0382 | 0.2701 | 0.0039  | 0.0408  | -0.1149 | 0.0057 | 0.0053 | 0.0053 |

|                |   |   |                 |            |            |                 |                 |                 |            |            |            |
|----------------|---|---|-----------------|------------|------------|-----------------|-----------------|-----------------|------------|------------|------------|
| rs497<br>6033  | a | g | -<br>0.029<br>2 | 0.026<br>6 | 0.272<br>3 | 0.001           | 0.021<br>5      | -<br>0.014<br>1 | 0.004      | 0.003<br>7 | 0.003<br>6 |
| rs498<br>3559  | a | g | 0.029<br>2      | 0.026<br>7 | 0.273<br>2 | -<br>0.002<br>6 | -<br>0.019<br>7 | 0.000<br>1      | 0.003<br>8 | 0.003<br>6 | 0.003<br>5 |
| rs783<br>2643  | t | g | 0.027<br>5      | 0.025<br>3 | 0.276<br>5 | 0.033<br>9      | -0.001          | 0.001<br>7      | 0.003<br>8 | 0.003<br>5 | 0.003<br>4 |
| rs645<br>0176  | a | g | 0.030<br>3      | 0.028      | 0.279<br>4 | 0.010<br>4      | -<br>0.025<br>4 | 0.019<br>1      | 0.004<br>2 | 0.003<br>9 | 0.003<br>8 |
| rs760<br>7980  | t | c | 0.037<br>9      | 0.036<br>6 | 0.300<br>3 | 0.006<br>5      | -<br>0.044<br>7 | 0.036<br>2      | 0.005<br>6 | 0.005<br>2 | 0.005      |
| rs267<br>733   | a | g | 0.035<br>6      | 0.034<br>4 | 0.301<br>7 | 0.033<br>1      | -<br>0.016<br>1 | 0.002<br>5      | 0.005<br>3 | 0.005      | 0.004<br>8 |
| rs458<br>7594  | a | g | 0.026<br>2      | 0.025<br>8 | 0.309<br>8 | -<br>0.049<br>3 | -<br>0.014<br>7 | -<br>0.069<br>4 | 0.003<br>9 | 0.003<br>6 | 0.003<br>5 |
| rs969<br>3857  | t | c | -<br>0.026<br>5 | 0.026<br>6 | 0.318<br>7 | -<br>0.004<br>6 | -<br>0.003<br>7 | 0.020<br>2      | 0.003<br>7 | 0.003<br>5 | 0.003<br>4 |
| rs116<br>9288  | a | c | 0.028<br>9      | 0.029<br>4 | 0.325      | -<br>0.037<br>5 | -<br>0.009<br>6 | -<br>0.002<br>5 | 0.004      | 0.003<br>7 | 0.003<br>6 |
| rs258<br>7534  | a | g | -<br>0.024<br>2 | 0.024<br>7 | 0.327<br>5 | 0.039<br>1      | 0.009<br>3      | 0.004<br>1      | 0.003<br>7 | 0.003<br>4 | 0.003<br>3 |
| rs424<br>0624  | a | g | -<br>0.044<br>2 | 0.045<br>3 | 0.329<br>2 | 0.067<br>2      | 0.081<br>8      | -<br>0.027<br>8 | 0.006<br>3 | 0.005<br>8 | 0.005<br>7 |
| rs121<br>45743 | t | g | -<br>0.025<br>4 | 0.026<br>1 | 0.329<br>7 | 0.004<br>2      | -<br>0.020<br>3 | 0.012<br>3      | 0.003<br>9 | 0.003<br>6 | 0.003<br>6 |
| rs176<br>95224 | a | g | -<br>0.026<br>7 | 0.027<br>7 | 0.334<br>5 | -<br>0.010<br>7 | -0.029          | 0.011<br>8      | 0.004<br>2 | 0.003<br>9 | 0.003<br>8 |
| rs105<br>13688 | a | g | -<br>0.039<br>4 | 0.041<br>6 | 0.343<br>5 | 0.022<br>2      | -<br>0.004<br>9 | 0.030<br>6      | 0.006<br>1 | 0.005<br>7 | 0.005<br>6 |
| rs260<br>2836  | a | g | 0.022<br>9      | 0.024<br>7 | 0.354<br>4 | -<br>0.000<br>7 | 0.019<br>2      | -0.009          | 0.003<br>7 | 0.003<br>4 | 0.003<br>3 |

|            |   |   |         |        |        |         |         |         |        |        |        |
|------------|---|---|---------|--------|--------|---------|---------|---------|--------|--------|--------|
| rs10861661 | a | c | -0.0267 | 0.0288 | 0.3548 | -0.0004 | 0.022   | -0.0227 | 0.0045 | 0.0042 | 0.0041 |
| rs634869   | t | c | 0.023   | 0.0249 | 0.3566 | 0.0127  | -0.0234 | 0.0272  | 0.0037 | 0.0034 | 0.0033 |
| rs12801636 | a | g | 0.0267  | 0.0292 | 0.3607 | 0.0078  | 0.0235  | -0.0177 | 0.0045 | 0.0042 | 0.004  |
| rs2737252  | a | g | 0.0251  | 0.0275 | 0.3612 | -0.0314 | -0.0126 | -0.0092 | 0.0041 | 0.0038 | 0.0037 |
| rs17345563 | a | g | 0.0348  | 0.0385 | 0.3665 | 0.0358  | -0.0143 | 0.015   | 0.0057 | 0.0053 | 0.0052 |
| rs6805251  | t | c | 0.0224  | 0.025  | 0.3707 | 0.012   | 0.02    | -0.0011 | 0.0037 | 0.0035 | 0.0034 |
| rs2287623  | a | g | -0.0222 | 0.0251 | 0.3767 | -0.0217 | -0.0112 | 0.0006  | 0.0037 | 0.0035 | 0.0034 |
| rs2923084  | a | g | -0.028  | 0.0317 | 0.3772 | -0.0121 | 0.0256  | -0.0119 | 0.0049 | 0.0045 | 0.0044 |
| rs13326165 | a | g | -0.03   | 0.0341 | 0.3788 | -0.0042 | 0.0289  | -0.0205 | 0.0046 | 0.0043 | 0.0042 |
| rs4530754  | a | g | -0.0215 | 0.0245 | 0.3802 | 0.0275  | 0.0008  | 0.0015  | 0.0036 | 0.0034 | 0.0033 |
| rs8176720  | t | c | 0.0226  | 0.0259 | 0.384  | 0.0332  | 0.0005  | -0.0073 | 0.0038 | 0.0036 | 0.0035 |
| rs3996352  | a | g | -0.0212 | 0.0245 | 0.3874 | 0.0053  | -0.0296 | 0.0179  | 0.0037 | 0.0034 | 0.0033 |
| rs5880     | c | g | 0.0484  | 0.0575 | 0.4002 | 0.047   | -0.3071 | 0.0475  | 0.0096 | 0.009  | 0.0085 |
| rs11045163 | a | g | -0.0204 | 0.0252 | 0.4178 | 0.0055  | -0.0217 | 0.0097  | 0.0037 | 0.0035 | 0.0034 |
| rs8077889  | a | c | -0.0244 | 0.0303 | 0.4207 | -0.0005 | 0.0205  | -0.0252 | 0.0046 | 0.0043 | 0.0042 |

|            |   |   |         |        |        |         |         |         |        |        |        |
|------------|---|---|---------|--------|--------|---------|---------|---------|--------|--------|--------|
| rs868943   | a | g | -0.0201 | 0.025  | 0.4208 | -0.0264 | -0.0075 | -0.0137 | 0.0037 | 0.0035 | 0.0034 |
| rs4846914  | a | g | -0.0201 | 0.0255 | 0.4287 | -0.0043 | 0.0479  | -0.0401 | 0.0037 | 0.0034 | 0.0034 |
| rs492602   | a | g | -0.0201 | 0.0257 | 0.4334 | -0.0293 | 0.0032  | -0.0139 | 0.0039 | 0.0036 | 0.0035 |
| rs1186380  | t | c | 0.0243  | 0.0313 | 0.4389 | -0.0244 | -0.0002 | 0.0026  | 0.0043 | 0.004  | 0.0039 |
| rs7264396  | t | c | -0.0231 | 0.0301 | 0.4426 | -0.0246 | -0.0054 | -0.0108 | 0.0045 | 0.0042 | 0.0041 |
| rs2278236  | a | g | -0.0183 | 0.0248 | 0.4595 | 0.0067  | 0.0331  | -0.0141 | 0.0038 | 0.0035 | 0.0034 |
| rs10019888 | a | g | 0.0245  | 0.0338 | 0.4681 | -0.0182 | 0.027   | -0.0228 | 0.005  | 0.0046 | 0.0045 |
| rs2240327  | a | g | 0.0176  | 0.0243 | 0.4708 | -0.0005 | -0.0242 | 0.0017  | 0.0036 | 0.0034 | 0.0033 |
| rs12525163 | t | c | -0.0196 | 0.0271 | 0.4711 | 0.0043  | -0.0215 | 0.0086  | 0.004  | 0.0037 | 0.0037 |
| rs217386   | a | g | 0.0167  | 0.0248 | 0.5003 | -0.0363 | 0.0013  | -0.0101 | 0.0038 | 0.0035 | 0.0034 |
| rs2326077  | t | c | -0.0173 | 0.026  | 0.5043 | -0.0341 | -0.0043 | -0.018  | 0.0038 | 0.0035 | 0.0034 |
| rs2030746  | t | c | -0.0167 | 0.0251 | 0.5055 | 0.0214  | -0.0025 | 0.0031  | 0.0038 | 0.0036 | 0.0035 |
| rs1688030  | t | c | 0.0322  | 0.0487 | 0.5083 | -0.0163 | -0.0085 | -0.0378 | 0.0076 | 0.007  | 0.0068 |
| rs749671   | a | g | -0.0165 | 0.0255 | 0.5171 | -0.0152 | 0.0071  | -0.0211 | 0.0037 | 0.0035 | 0.0034 |
| rs6016381  | t | c | 0.0163  | 0.0253 | 0.5186 | 0.0363  | -0.0084 | 0.0144  | 0.0038 | 0.0035 | 0.0034 |

|            |   |   |         |        |        |         |         |         |        |        |        |
|------------|---|---|---------|--------|--------|---------|---------|---------|--------|--------|--------|
| rs9930333  | t | g | -0.0159 | 0.0247 | 0.5199 | 0.0002  | 0.0199  | -0.0208 | 0.0041 | 0.0037 | 0.0037 |
| rs2710642  | a | g | -0.0163 | 0.0261 | 0.5314 | 0.0239  | -0.0096 | 0.0065  | 0.0038 | 0.0035 | 0.0034 |
| rs2297374  | t | c | -0.0155 | 0.0254 | 0.5405 | -0.0325 | 0.0056  | -0.0091 | 0.0038 | 0.0035 | 0.0034 |
| rs686030   | a | c | 0.0213  | 0.0353 | 0.5467 | 0.0085  | 0.055   | 0.025   | 0.0052 | 0.0049 | 0.0048 |
| rs688      | t | c | 0.0141  | 0.0245 | 0.5633 | 0.054   | -0.0106 | 0.0041  | 0.0037 | 0.0034 | 0.0034 |
| rs4148005  | t | g | 0.0149  | 0.0263 | 0.5711 | -0.015  | 0.0283  | -0.0066 | 0.0039 | 0.0036 | 0.0035 |
| rs9875338  | a | g | 0.0142  | 0.025  | 0.5715 | -0.027  | -0.0073 | -0.0144 | 0.0037 | 0.0035 | 0.0034 |
| rs6680658  | a | g | -0.0164 | 0.029  | 0.5717 | -0.0055 | 0.0232  | -0.0166 | 0.0045 | 0.0041 | 0.004  |
| rs17286602 | a | t | -0.0135 | 0.0246 | 0.5821 | -0.0032 | 0.021   | -0.006  | 0.0037 | 0.0034 | 0.0033 |
| rs4921914  | t | c | 0.0161  | 0.0296 | 0.5856 | -0.0229 | -0.0019 | -0.0353 | 0.0044 | 0.0041 | 0.004  |
| rs16942887 | a | g | 0.0202  | 0.0375 | 0.5905 | 0.0011  | 0.0831  | -0.0115 | 0.0054 | 0.0051 | 0.005  |
| rs2294261  | a | c | 0.0142  | 0.0265 | 0.5916 | 0.0333  | -0.0085 | 0.0021  | 0.0037 | 0.0035 | 0.0034 |
| rs2073547  | a | g | -0.0169 | 0.0321 | 0.5983 | -0.0485 | 0.0049  | -0.0148 | 0.0049 | 0.0045 | 0.0044 |
| rs7117842  | t | c | 0.0131  | 0.0253 | 0.6045 | -0.0192 | -0.0272 | 0.002   | 0.0038 | 0.0035 | 0.0034 |
| rs10903129 | a | g | 0.0123  | 0.0246 | 0.6163 | -0.0328 | -0.0009 | -0.008  | 0.0037 | 0.0034 | 0.0033 |

|            |   |   |         |        |        |         |         |         |        |        |        |
|------------|---|---|---------|--------|--------|---------|---------|---------|--------|--------|--------|
| rs4650994  | a | g | -0.0121 | 0.0243 | 0.6199 | 0.0027  | -0.021  | 0.0024  | 0.0036 | 0.0034 | 0.0033 |
| rs2925979  | t | c | 0.013   | 0.0265 | 0.6243 | -0.0031 | -0.0351 | 0.0205  | 0.004  | 0.0037 | 0.0036 |
| rs364585   | a | g | 0.0122  | 0.025  | 0.6263 | -0.0249 | -0.0005 | 0.0018  | 0.0038 | 0.0035 | 0.0034 |
| rs3741414  | t | c | -0.014  | 0.0288 | 0.6268 | -0.0159 | 0.0296  | -0.028  | 0.0043 | 0.004  | 0.0039 |
| rs7225700  | t | c | 0.0125  | 0.0257 | 0.6277 | -0.0297 | -0.0098 | 0.0046  | 0.0038 | 0.0035 | 0.0035 |
| rs1800562  | a | g | -0.0227 | 0.0493 | 0.6444 | -0.0615 | -0.0074 | 0.013   | 0.008  | 0.0074 | 0.0072 |
| rs731839   | a | g | 0.0121  | 0.0263 | 0.6461 | 0.0018  | 0.022   | -0.0224 | 0.004  | 0.0037 | 0.0036 |
| rs12133576 | a | g | 0.0099  | 0.0254 | 0.6975 | 0.0104  | 0.0243  | -0.009  | 0.0038 | 0.0035 | 0.0034 |
| rs2303975  | a | g | -0.0141 | 0.0378 | 0.7087 | -0.0013 | 0.0279  | -0.0115 | 0.0053 | 0.0049 | 0.0048 |
| rs702485   | a | g | -0.0088 | 0.0257 | 0.7319 | -0.001  | -0.0243 | 0.0016  | 0.0037 | 0.0034 | 0.0033 |
| rs6831256  | a | g | 0.0078  | 0.0236 | 0.7402 | -0.0188 | 0.0131  | -0.0258 | 0.0038 | 0.0036 | 0.0035 |
| rs103294   | t | c | 0.0098  | 0.0314 | 0.7557 | 0.0073  | 0.0523  | -0.0021 | 0.0047 | 0.0044 | 0.0042 |
| rs442177   | t | g | -0.0077 | 0.025  | 0.7565 | 0.0159  | -0.0215 | 0.0309  | 0.0037 | 0.0034 | 0.0033 |
| rs9686661  | t | c | 0.0096  | 0.0314 | 0.7602 | 0.0179  | -0.0283 | 0.0379  | 0.0048 | 0.0044 | 0.0044 |
| rs10102164 | a | g | 0.0092  | 0.0302 | 0.7603 | 0.0316  | -0.0005 | 0.0113  | 0.0045 | 0.0042 | 0.0041 |

|            |   |   |         |        |        |         |         |         |        |        |        |
|------------|---|---|---------|--------|--------|---------|---------|---------|--------|--------|--------|
| rs16831243 | t | c | -0.0114 | 0.0387 | 0.7687 | 0.0378  | 0.0114  | -0.0006 | 0.0055 | 0.0051 | 0.0051 |
| rs355838   | t | g | 0.0064  | 0.0252 | 0.7998 | 0.0178  | -0.0191 | 0.0135  | 0.0038 | 0.0035 | 0.0034 |
| rs4942486  | t | c | -0.0059 | 0.0245 | 0.8106 | 0.0243  | -0.0136 | 0.0071  | 0.0037 | 0.0034 | 0.0033 |
| rs9491696  | c | g | 0.0058  | 0.0244 | 0.8132 | -0.0057 | 0.0203  | -0.0179 | 0.0037 | 0.0034 | 0.0034 |
| rs2642438  | a | g | -0.0064 | 0.0277 | 0.8162 | -0.0352 | -0.0303 | 0.0172  | 0.0042 | 0.0039 | 0.0038 |
| rs2068888  | a | g | -0.0057 | 0.025  | 0.8194 | -0.0166 | 0.0193  | -0.0241 | 0.0038 | 0.0035 | 0.0034 |
| rs1532085  | a | g | 0.0071  | 0.032  | 0.8249 | 0.0026  | 0.1068  | 0.031   | 0.0037 | 0.0035 | 0.0034 |
| rs1341267  | a | c | 0.0051  | 0.0248 | 0.8383 | 0.0016  | 0.0023  | -0.0184 | 0.0037 | 0.0034 | 0.0033 |
| rs11246602 | t | c | -0.0078 | 0.0392 | 0.842  | -0.0019 | -0.034  | 0.0091  | 0.0056 | 0.0052 | 0.0052 |
| rs10773105 | t | c | 0.0049  | 0.025  | 0.8446 | 0.0058  | -0.0363 | 0.0037  | 0.0037 | 0.0035 | 0.0034 |
| rs11220462 | a | g | 0.007   | 0.0358 | 0.8458 | 0.059   | -0.0162 | 0.0189  | 0.0059 | 0.0056 | 0.0054 |
| rs687339   | t | c | -0.0055 | 0.0292 | 0.8513 | 0.011   | -0.0316 | 0.0291  | 0.0045 | 0.0042 | 0.004  |
| rs8017377  | a | g | 0.0043  | 0.0252 | 0.8644 | 0.0303  | -0.0037 | 0.0056  | 0.0038 | 0.0036 | 0.0035 |
| rs10832962 | t | c | -0.0047 | 0.0278 | 0.8662 | 0.032   | 0.0043  | 0.0109  | 0.004  | 0.0038 | 0.0037 |
| rs10029254 | t | c | 0.0048  | 0.0286 | 0.8666 | 0.0058  | -0.0085 | 0.0266  | 0.0044 | 0.0041 | 0.0039 |

|            |   |   |         |        |        |         |         |         |        |        |        |
|------------|---|---|---------|--------|--------|---------|---------|---------|--------|--------|--------|
| rs903319   | t | c | 0.0044  | 0.0275 | 0.8725 | -0.0266 | -0.0103 | 0.0054  | 0.0041 | 0.0038 | 0.0037 |
| rs314253   | t | c | 0.0041  | 0.0258 | 0.8751 | 0.0242  | -0.003  | 0.0086  | 0.0038 | 0.0035 | 0.0034 |
| rs970548   | a | c | -0.0042 | 0.0283 | 0.8822 | -0.0157 | -0.0258 | -0.0025 | 0.0042 | 0.0039 | 0.0038 |
| rs4148218  | a | g | -0.0045 | 0.0317 | 0.886  | -0.0441 | 0.0029  | -0.0037 | 0.0047 | 0.0044 | 0.0042 |
| rs4969178  | a | g | -0.0034 | 0.0253 | 0.8944 | -0.011  | -0.0263 | 0.0175  | 0.0037 | 0.0035 | 0.0034 |
| rs7254892  | a | g | -0.0104 | 0.083  | 0.9    | -0.4853 | 0.0528  | 0.1235  | 0.0119 | 0.0113 | 0.0106 |
| rs5763662  | t | c | 0.0127  | 0.1093 | 0.9078 | 0.0767  | 0.0333  | -0.0001 | 0.0121 | 0.0112 | 0.0112 |
| rs1998013  | t | c | 0.0235  | 0.2154 | 0.9131 | -0.3806 | 0.0354  | 0.0089  | 0.022  | 0.0201 | 0.0199 |
| rs3198697  | t | c | -0.0025 | 0.0248 | 0.9204 | 0.0096  | 0.0163  | -0.0198 | 0.0037 | 0.0035 | 0.0034 |
| rs17788930 | a | g | -0.0024 | 0.0258 | 0.925  | 0.0046  | 0.0359  | -0.0112 | 0.0038 | 0.0036 | 0.0035 |
| rs4871137  | t | g | -0.0024 | 0.0262 | 0.9262 | -0.0043 | -0.0209 | -0.0013 | 0.0039 | 0.0037 | 0.0036 |
| rs4917014  | t | g | 0.0014  | 0.0262 | 0.956  | -0.0047 | -0.0222 | 0.0012  | 0.0039 | 0.0036 | 0.0035 |
| rs11563251 | t | c | 0.0021  | 0.0402 | 0.9589 | 0.0345  | 0.0058  | 0.0083  | 0.0062 | 0.0057 | 0.0056 |
| rs2241210  | a | g | -0.0012 | 0.0245 | 0.9617 | -0.0078 | -0.0332 | -0.0029 | 0.0037 | 0.0035 | 0.0033 |
| rs205262   | a | g | -0.001  | 0.0282 | 0.9713 | 0.0088  | 0.0283  | -0.0028 | 0.0041 | 0.0039 | 0.0038 |
| rs122      | a | g | -0.001  | 0.035  | 0.975  | -0.000  | -0.033  | 0.006   | 0.005  | 0.004  | 0.005  |

|           |   |   |         |        |        |         |        |         |        |        |        |
|-----------|---|---|---------|--------|--------|---------|--------|---------|--------|--------|--------|
| 26802     |   |   | 1       | 9      | 2      | 2       | 1      | 7       | 3      | 9      |        |
| rs1564348 | t | c | -0.001  | 0.0327 | 0.9765 | -0.0481 | 0.0077 | -0.0164 | 0.005  | 0.0046 | 0.0045 |
| rs603446  | t | c | -0.0004 | 0.0246 | 0.9874 | -0.0092 | 0.0018 | -0.0502 | 0.0037 | 0.0035 | 0.0034 |

**eTable 2.** Association of Lipid GRS with CHD in the CARDIoGRAMplusC4D Dataset Using Inverse Weighted MR and MR-Egger

| Lipid trait     | # of SNPS | Inverse variance weighted OR (lower, upper 95%CI) | MR-Egger OR (lower, upper 95%CI) | MR-Egger intercept P-value |
|-----------------|-----------|---------------------------------------------------|----------------------------------|----------------------------|
| LDL-cholesterol | 75        | 1.63 (1.45, 1.83)                                 | 1.83 (1.49, 2.25)                | 0.16                       |
| HDL-cholesterol | 84        | 0.76 (0.66,0.87)                                  | 0.96 (0.75, 1.22)                | 0.02                       |
| Triglycerides   | 50        | 1.51 (1.29, 1.76)                                 | 1.46 (1.12, 1.89)                | 0.75                       |

## eReferences

1. Jones GT, Tromp G, Kuivaniemi H et al. Meta-Analysis of Genome-Wide Association Studies for Abdominal Aortic Aneurysm Identifies Four New Disease-Specific Risk Loci. *Circulation research* 2017;120:341-353.
2. Bown MJ, Jones GT, Harrison SC et al. Abdominal aortic aneurysm is associated with a variant in low-density lipoprotein receptor-related protein 1. *Am J Hum Genet* 2011;89:619-27.
3. Borthwick KM, Smelser DT, Bock JA et al. ePhenotyping for Abdominal Aortic Aneurysm in the Electronic Medical Records and Genomics (eMERGE) Network: Algorithm Development and Konstanz Information Miner Workflow. *Int J Biomed Data Min* 2015;4.
4. Verma SS, de Andrade M, Tromp G et al. Imputation and quality control steps for combining multiple genome-wide datasets. *Front Genet* 2014;5:370.
5. Delaneau O, Marchini J, Zagury JF. A linear complexity phasing method for thousands of genomes. *Nat Methods* 2012;9:179-81.
6. Howie B, Fuchsberger C, Stephens M, Marchini J, Abecasis GR. Fast and accurate genotype imputation in genome-wide association studies through pre-phasing. *Nat Genet* 2012;44:955-9.
7. Purcell S, Neale B, Todd-Brown K et al. PLINK: a tool set for whole-genome association and population-based linkage analyses. *American journal of human genetics* 2007;81:559-75.
8. Gretarsdottir S, Baas AF, Thorleifsson G et al. Genome-wide association study identifies a sequence variant within the DAB2IP gene conferring susceptibility to abdominal aortic aneurysm. *Nature Genetics* 2010;42:692-U71.
9. Gretarsdottir S, Thorleifsson G, Reynisdottir ST et al. The gene encoding phosphodiesterase 4D confers risk of ischemic stroke. *Nature genetics* 2003;35:131-8.
10. JA Rice. Generalized likelihood ratio tests. *Mathematical Statistics and Data Analysis Vol 1 International Thomson Publishing* 1995:308-310.
11. Howie B, Marchini J, Stephens M. Genotype imputation with thousands of genomes. *G3 (Bethesda)* 2011;1:457-70.
12. Devlin B, Roeder K. Genomic control for association studies. *Biometrics* 1999;55:997-1004.
13. Simons PC, Algra A, van de Laak MF, Grobbee DE, van der Graaf Y. Second manifestations of ARterial disease (SMART) study: rationale and design. *Eur J Epidemiol* 1999;15:773-81.
14. Schunkert H, König IR, Kathiresan S et al. Large-scale association analysis identifies 13 new susceptibility loci for coronary artery disease. *Nature genetics* 2011;43:333-8.
